# Supplementary material for: Heterologous microProtein expression identifies LITTLE NINJA, a dominant regulator of jasmonic acid signaling
Source: PubMed Central journal article supplement (PMC7584889; doi:10.1073/pnas.2005198117), 2020-10-08
Supplement: pnas.2005198117.sapp.pdf [file pnas.2005198117.sapp.pdf]

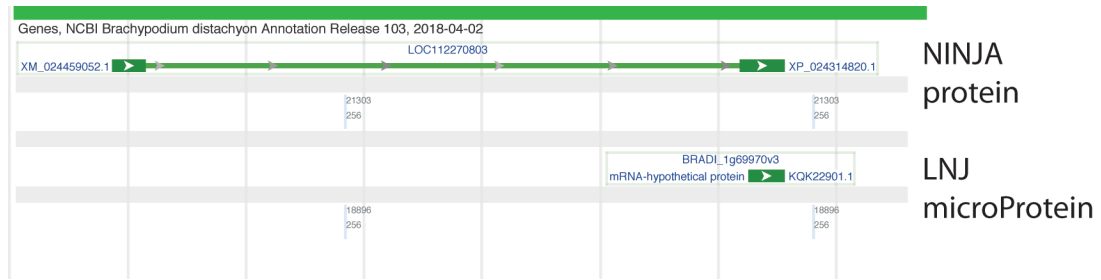

**Supplementary Figure S1. Genome browser snapshot showing the Brachypodium LOC112270803 gene.** Annotated in the Brachypodium genome was BRADI1g69970v3 encoding the LNJ microProtein. In-depth analysis revealed that LNJ is a splice variant of a larger gene encoding a NINJA-like protein.

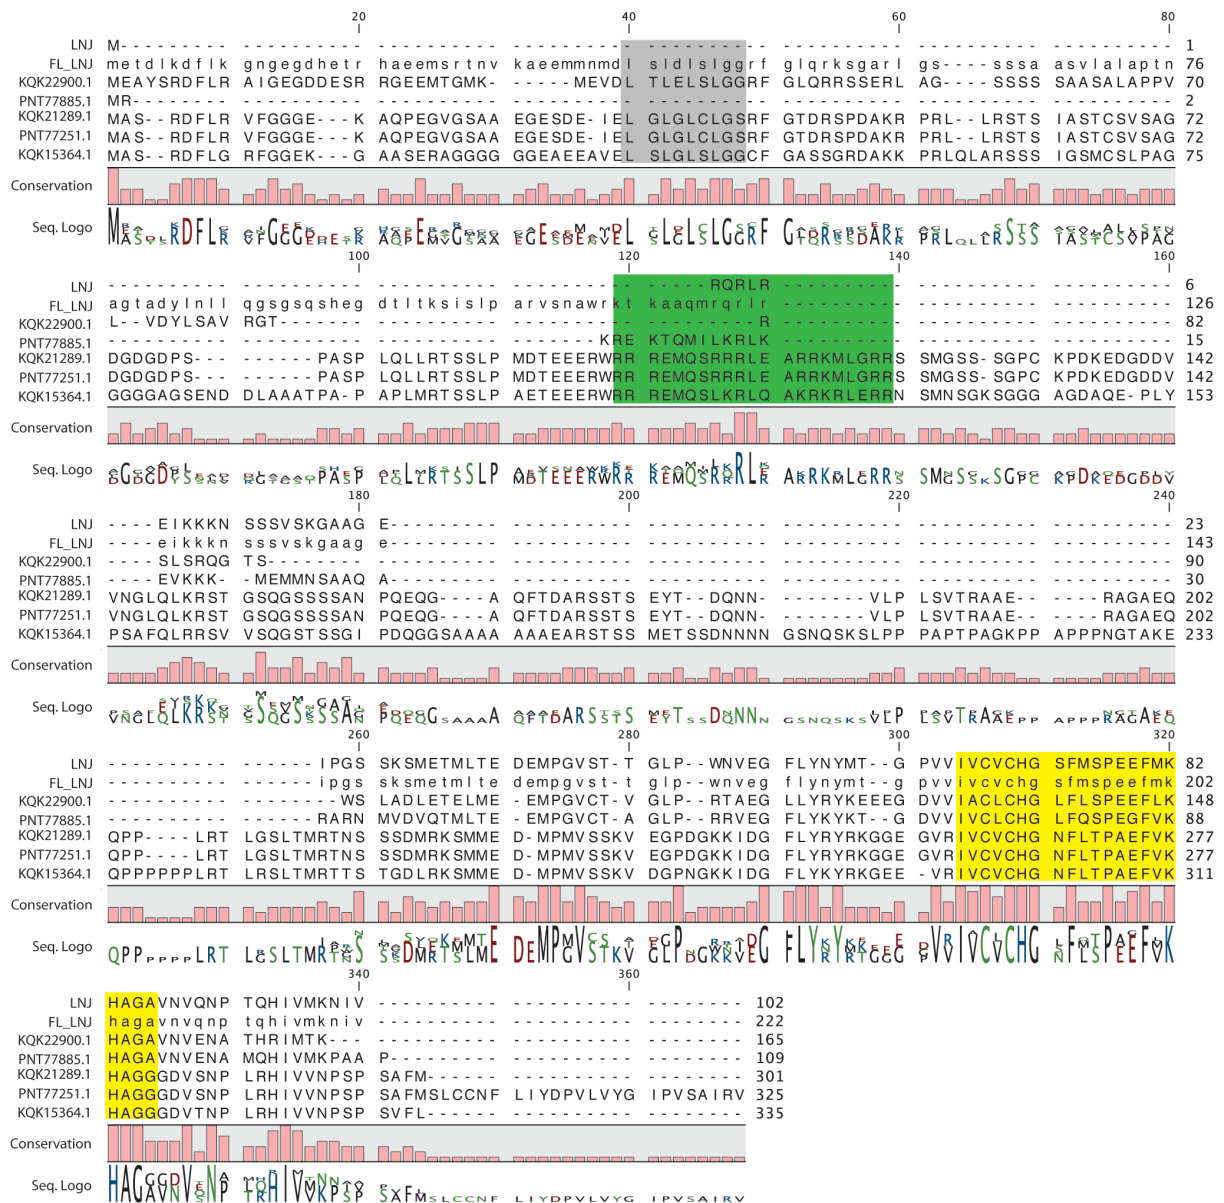

**Supplementary Figure S2. LNJ and Brachypodium NINJA-like proteins multiple sequence alignment.** Multiple protein sequence alignment of LNJ with related proteins was carried out using CLC Workbench 7 align tools. Gray box indicates Ethylene-responsive element binding factor-associated Amphiphilic Repression (EAR) motif, defined by the consensus sequence patterns of either LxLxL or DLNxxP. The green box highlights domain B and the yellow box highlight domain C.

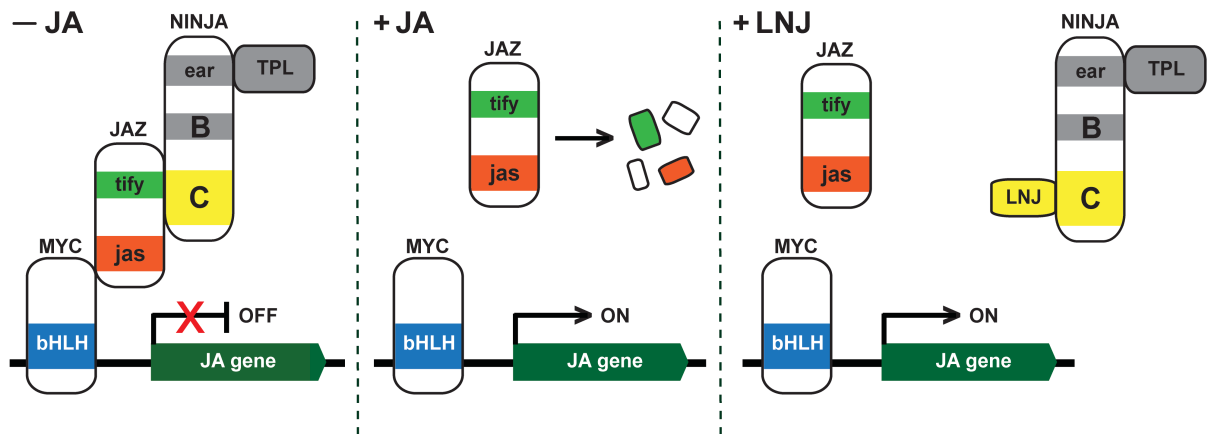

**Supplementary Figure S3. Hypothetical model for the action mechanism of LNJ microProtein in the JA signaling.** In the absence of jasmonic acid (left), JAZ proteins interacting through the TIFY motif with domain C of NINJA to keep MYC factors in a repressed state. The EAR motif of NINJA is essential for the interaction with the TPL co-repressors. In the presence of jasmonic acid (middle), JAZ proteins subsequently release NINJA/TPL complex from the MYC factors and induce jasmonate-responsive genes which mediate various responses including pathogen defense. In the case of introducing LNJ in the JA signaling (right), NINJA protein can interact with LNJ microProtein via its domain C. NINJA function can thereby be modulated by LNJ microProtein in various JA mediated response.

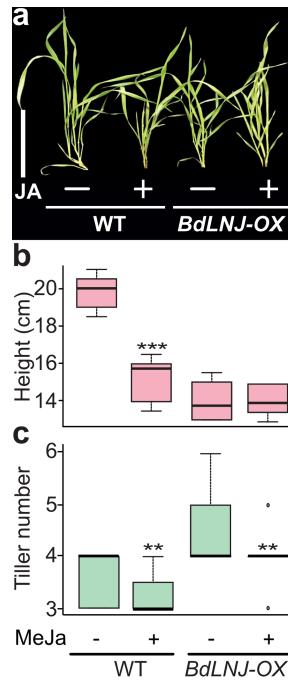

**Supplementary Figure S4. MeJA treatment of wild type and BdLNJ-OX plants.**

**a** Pictures of wild-type Bd21-3 and the strongest overexpressing BdLNJ-OX line. Scale bar, 10 cm. **b, c** Quantification of height (**b**) and tiller number (**c**) depicted as box plots in wild-type and three independent wild-type Bd21-3, the strongest overexpressing BdLNJ-OX line +/- MeJA treatment. \* $P < 0.05$ , \*\* $P < 0.005$ , \*\*\* $P < 0.0005$  determined by Student's T-Test. N = 15-20.



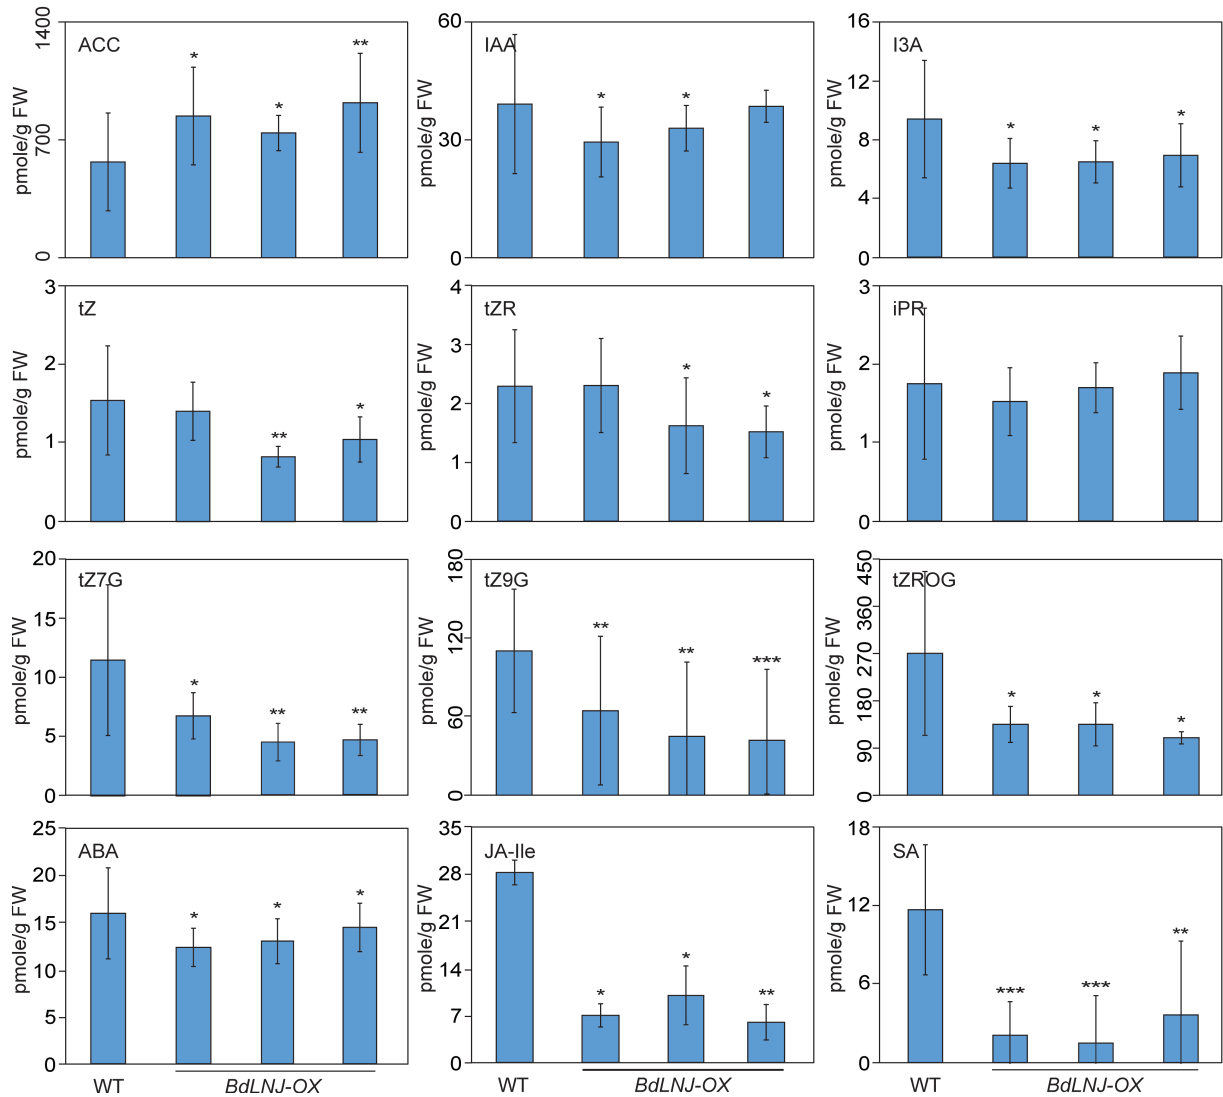

**Supplementary Figure S5. Endogenous hormone levels in *Brachypodium* wild-type and *BdLNJ-OX* plants.** The hormone levels in leaves were measured using UHPLC/TQ-MS. ACC, 1-aminocyclopropane-1-carboxylic acid; IAA, Indole-3-acetic acid; I3A, Indole-3-carboxaldehyde; tZ, trans-zeatin; tZR, tZ riboside; iPR, N6-( $\Delta^2$ -isopentenyl) adenine (iP), iP riboside; tZ7G, Trans-zeatin-7-glucoside; tZ9G, Trans-zeatin-9-glucoside; tZROG, tZR-O-glucoside; ABA, abscisic acid; JA-Ile, jasmonoyl-L-isoleucine; SA, salicylic acid. Values are the means  $\pm$ SD. N = 6-8. \*P<0.05, \*\*P<0.005, \*\*\*P<0.0005, determined by Student's T-Test.

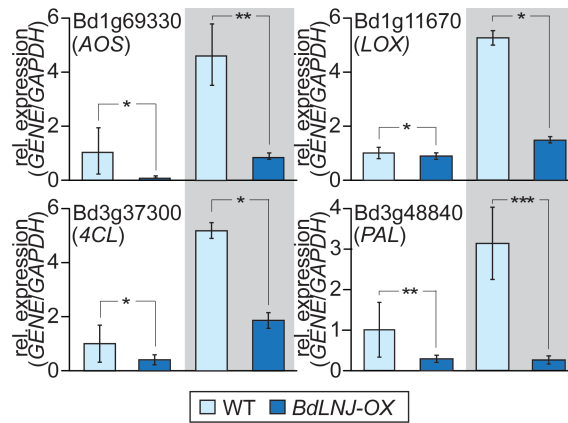

**Supplementary Figure S6. Relative expression levels of JA biosynthesis and response genes in wild-type and BdLNJ-OX plants in MeJA treatment.** Relative expression levels of JA biosynthesis/response genes in wild-type and the strongest overexpressing BdLNJ-OX line determined by qRT-PCR with MeJA treatment (gray boxed). PAL is an ethylen response gene that is also induced by methyl-jasmonate (see Kouzai et al., BMC Plant Biology, 2016). Expression levels, determined as relative quantities and normalized against *Brachypodium* GAPDH gene, are depicted as bar graphs. \* $P < 0.05$ , \*\* $P < 0.005$ , \*\*\* $P < 0.0005$  determined by Student's T-Test.

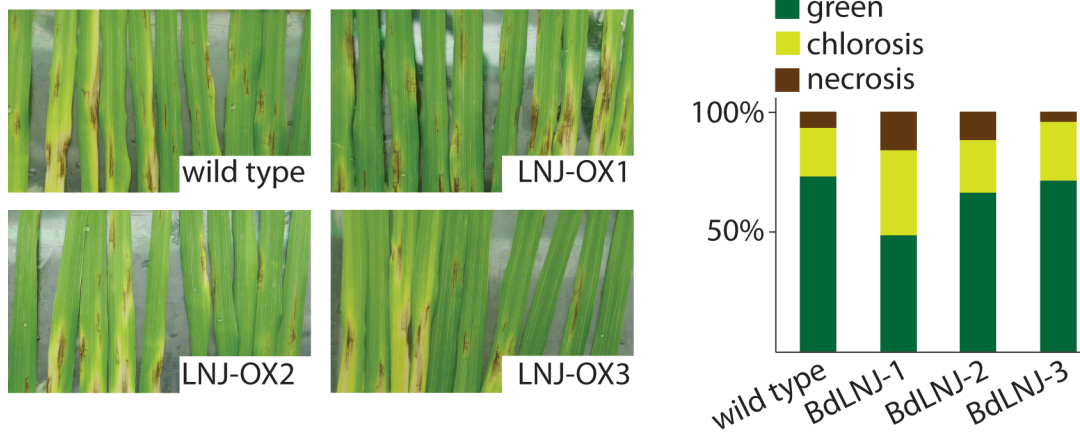

**Supplementary Figure S7. Determination of pathogen susceptibility of wild type and transgenic barley plants.** Wild type and transgenic *LNJ-OX* plants were infected with *Pyrenophora teres* (CP2189). Chlorotic and necrotic leaf areas were measured and percentages were calculated using Assess 2.0 from APS.

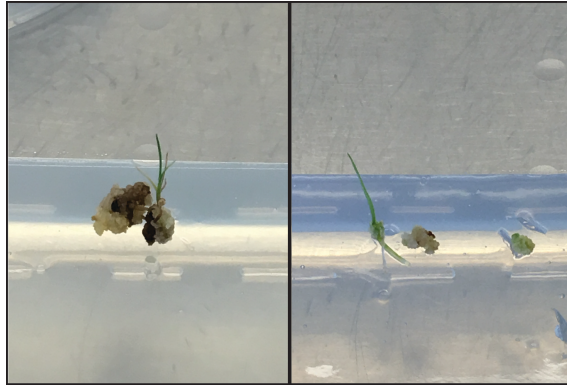

**Supplementary Figure S8. Regeneration of transgenic plants transformed with a CRISPR/Cas9 guide RNAs targeting the *LNJ* gene.** After isolation of transgenic calli, shoots were regenerated but transgenic plants failed root regeneration and died soon after. This indicated that the *LNJ* gene is essential for plant development.

**Supplemental Table 1: Oligonucleotides used in this study.**

| Primer                   | Gene ID           | Sequence                                                                                                                  | Purpose        |
|--------------------------|-------------------|---------------------------------------------------------------------------------------------------------------------------|----------------|
| BdLNJ F<br>BdLNJ R       | BD1G69970         | ggggacaagttgtacaaaaaagcaggcttcATGCGGCAGAGGCTCAGGGA<br>ggggaccactttgtacaagaaagctgggtcCTAGACTATGTTTTTC                      | Cloning<br>CDS |
| LNJ F<br>LNJ R           | AT1G13740         | ggggacaagttgtacaaaaaagcaggcttcATGGCTACGTCTACTGGTTTTGG<br>ggggaccactttgtacaagaaagctgggtcTAAAAGGTCTGAAGAAGAGGTG             | Cloning<br>CDS |
| BTB-POZ F<br>BTB-POZ R   | AT5G19000         | ggggacaagttgtacaaaaaagcaggcttcATGCTCCATTTTATCTACTGGGACG<br>ggggaccactttgtacaagaaagctgggtcTCACCTCGCCACATACTGCAATAGCTC<br>C | Cloning<br>CDS |
| BTB-ZF F<br>BTB-ZF R     | AT3G42170         | ggggacaagttgtacaaaaaagcaggcttcATGGCTAGAGACATCC<br>ggggaccactttgtacaagaaagctgggtcCTATGCTTCAGATTTGATGG                      | Cloning<br>CDS |
| SERPIN F<br>SERPIN R     | AT2G26390         | ggggacaagttgtacaaaaaagcaggcttcATGGTTGATTGCGCTTCGAACGG<br>ggggaccactttgtacaagaaagctgggtcTCAATGTTTAGAAGGATCAAGAACTTG<br>ACC | Cloning<br>CDS |
| XHXS F<br>XHXS R         | AT3G12550         | ggggacaagttgtacaaaaaagcaggcttcATGTGGGAGGAATATCTTAAGGACCC<br>ggggaccactttgtacaagaaagctgggtcTTATGACTTGAGATGCTTCGC           | Cloning<br>CDS |
| BdJAZ1 F<br>BdJAZ1R      | BRADI_1g21<br>490 | ggggacaagttgtacaaaaaagcaggcttcATGGCGGCTTCCACGAGGCC<br>ggggaccactttgtacaagaaagctgggtcCTAAAGCTCAGTTTTGGCGG                  | Cloning<br>CDS |
| BdNINJA F<br>BdNINJA R   | BRADI_2g11<br>790 | caccATGGAGGATGGCCTTGAGCTTAG<br>CTAGTTTTGGGCTGAGGCTGC                                                                      | Cloning<br>CDS |
| BdLNJ qF<br>BdLNJ qR     | BD1G69970         | ACCAGGGAGTAGCAAGAGCA<br>CAGCTCCAGCATGCTTCATA                                                                              | qRT-PCR        |
| LNJ qF<br>LNJ qR         | AT1G13740         | GGTTGATATGCCTTGTGTGTTTACT<br>AAGAAGAGGTGTTGACAACGATATG                                                                    | qRT-PCR        |
| BTB-POZ qF<br>BTB-POZ qR | AT5G19000         | GAGCGGCTTAAAGCAATCTG<br>CTGCAAACAATGATGCTGCT                                                                              | qRT-PCR        |
| BTB-ZF qF<br>BTB-ZF qR   | AT3G42170         | TCAGCTGCAGCCTTTGACTA<br>CTCAAGAAGCCATTCCCTTG                                                                              | qRT-PCR        |
| SERPIN qF<br>SERPIN qR   | AT2G26390         | GCCTTCGAACGGTGATAAAC<br>ATCAAACATTGGGGCATCAT                                                                              | qRT-PCR        |
| XHXS qF<br>XHXS qR       | AT3G12550         | CCCAGATTGGCATCCTTTTA<br>TCCCCCAGTTCATTCTTCAG                                                                              | qRT-PCR        |
| AtGAPDH qF<br>AtGAPDH qR | AT1G13440         | AAAGTGTGGCCATCCCTCAA<br>TCGGTAGACACAACATCATCCT                                                                            | qRT-PCR        |
| PR14 qF<br>PR14 qR       | BD1G19470         | CCATCTGCGACATCTCCAGC<br>CGCTCTTGACCGGCAGAG                                                                                | qRT-PCR        |
| PR2 qF<br>PR2 qR         | BD3G07960         | GTTCAACGTCGCCATGGAC<br>TGGGTCTTAACGTCGTTGGG                                                                               | qRT-PCR        |
| DOF qF<br>DOF qR         | BD3G51510         | GAATAATCAACCACCGGCGC<br>GCAGTTGATCGCCTTCTCCT                                                                              | qRT-PCR        |
| MYB86 qF<br>MYB86 qR     | BD2G17982         | TGGAACAGCTGCCTCAAGAA<br>CGGCTTCTGGTCTTCGTCTT                                                                              | qRT-PCR        |

|                                |           |                                              |         |
|--------------------------------|-----------|----------------------------------------------|---------|
| JMT qF<br>JMT qR               | BD2G47550 | TCTTCCCCTTGTTGATCGGC<br>GTTCAACGTCGCCATGGAC  | qRT-PCR |
| SnR-Kinase qF<br>SnR-Kinase qR | BD4G30390 | GGCATGTCGGAGCAGATGAA<br>CTCCAGGGCCAGGTAGATCT | qRT-PCR |

| Primer                   | Gene ID      | Sequence                                         | Purpose |
|--------------------------|--------------|--------------------------------------------------|---------|
| MADS qF<br>MADS qR       | BD1G21980    | CCAGAATCTCAGCCGTCTCC<br>CTGATGGCACCGATATCCCC     | qRT-PCR |
| AGL7 qF<br>AGL7 qR       | BD1G08340    | AAGAAGGCGCACGAGATCTC<br>CATACATGAGTCGGTGGCGA     | qRT-PCR |
| AOS7 qF<br>AOS7 qR       | BD1G69330    | ACCGCCTGGACTTCTACTAC<br>GAGGTTCTTCTTCTCCACCT     | qRT-PCR |
| LOX qF<br>LOX qR         | BD1G11670    | TCAACTTGCCCTTTCCACATG<br>GCAAACCGGATTAACCTCTGC   | qRT-PCR |
| 4CL qF<br>4CL qR         | BD3G37300    | GTTTCGAGACGGTGAGGATGTTC<br>CATACTTTCCAACAGCGTCGC | qRT-PCR |
| PAL qF<br>PAL qR         | BD3G48840    | TCTTTGAGGCAAACATTCTT<br>ATAGCAGCAGCCTCTATTTG     | qRT-PCR |
| BdGAPDH qF<br>BdGAPDH qR | BD3G14040    | TTGCTCTCCAGAGCGATGAC<br>CTCCACGACATAATCGGCAC     | qRT-PCR |
| HvGAPDH qF<br>HvGAPDH qR | HV1G074690   | GCCAAGACCCAGTAGAGC<br>CACATTTATTCCCATAGACAAAGG   | qRT-PCR |
| OsACTIN qF<br>OsACTIN qR | OS08T0126300 | CCCAGGAATTGCTGACCGTA<br>TTTTCTCTCTGGCGGTGCA      | qRT-PCR |

## Supplementary data sets

**Supplementary dataset 1. Identification of differentially expressed genes using RNA-seq.** The file contains two spreadsheets containing differentially expressed genes in Col-0 wild type versus transgenic *LNJ-OX* plants and differentially expressed genes in Col-0 wild type versus *jazD* mutant plants.

**Supplementary dataset 2. Identification of differentially expressed genes in *Brachypodium*.** Shown is own spreadsheet containing all comparison of the four different datasets (wild type mock; wild type MeJA-treatment; *LNJ-OX* mock; *LNJ-OX* MeJA-treatment).
